# Supplementary material
Source: PubMed Central journal article supplement (PMC5322057)
Supplement: NIHMS840059-supplement-Supplemental_Material_Revision.pdf [file NIHMS840059-supplement-Supplemental_Material_Revision.pdf]

# SUPPLEMENTAL MATERIAL

## 1. Supplemental Methods

**1.1 Cohort description and protocols for covariate assessment** (p. 2)

**1.2 Cohort-specific ascertainment of atrial fibrillation** (p. 4)

## 2. Supplemental Tables and Figures

### 2.1 Supplemental Tables

**Supplemental Table 1:** Characteristics of genotyping methodology, per cohort (p. 5)

**Supplemental Table 2:** Characteristics of the 39 established single nucleotide polymorphisms (SNPs) associated with body mass index (BMI) (p. 7)

**Supplemental Table 3:** Heterogeneity of meta-analyzed genetic instrument association with BMI and AF: meta-regression analysis (p. 9)

**Supplemental Table 4:** Meta-analyzed instrumental variable estimates of BMI-atrial fibrillation association: sensitivity analysis (p. 10)

### 2.2 Supplemental Figures

**Supplemental Figure Legends** (p. 11)

**Supplemental Figure 1:** Meta-regression plot of genetic instrument effect size and mean cohort age (p. 12)

**Supplemental Figure 2:** Genetic instruments and body mass index: multivariable adjustment (p.13)

**Supplemental Figure 3:** Genetic instruments and atrial fibrillation: adjustment for BMI (p. 15)

## 3. Supplemental References (p. 17)

## Supplemental Methods

### 1.1 Cohort description and protocols for covariate assessment

#### AGES

The Age, Gene/Environment Susceptibility-Reykjavik Study (AGES-Reykjavik) cohort is a prospective, community-based cohort study previously described in detail.<sup>1</sup> AGES was designed to examine risk factors, genetic susceptibility and gene-environment interaction in relation to disease in the elderly. The AGES cohort was drawn from an established population-based cohort (Reykjavik Study) that has been followed since 1967 by the Icelandic Heart Association. Enrollment in the AGES-Reykjavik study occurred between 2002-2006, and follow-up continued until 2012 for this study. The AGES study was approved by the National Bioethics Committee in Iceland, the National Institute on Aging Intramural Institutional Review Board, and the Data Protection Authority in Iceland. Informed consent was obtained from all study participants.

Standard examination protocols and questionnaires were completed in the AGES study. Clinic visits included anthropometry, blood pressure measurement (defined as the mean value of two consecutive blood pressure measurements), electrocardiogram (ECG), and measures of different physical and cognitive function domains. Diabetes was defined from a self-report of a physician diagnosis, use of oral hypoglycemic agents or insulin, or a fasting blood glucose  $\geq 126$  mg/dL. Diagnoses of myocardial infarction and heart failure were based on hospital discharge records.<sup>1</sup>

#### ARIC

The Atherosclerosis Risk in Communities (ARIC) study is a prospective cohort study of 15,792 men and women aged 45–64, recruited from four communities in the US (Washington County, MD; suburbs of Minneapolis, MN; Jackson, MS; Forsyth County, NC) in 1987–89. Participants were mostly white in the Washington County and Minneapolis centers, only African-American in the Jackson center, and included both races in Forsyth County. After the initial assessment, study participants were examined four additional times (1990–92, 1993–95, 1996–98, 2011–13). Follow-up for this analysis was through 2010. The University of Minnesota Institutional Review Board approved the present ARIC study, and all participants enlisted in the ARIC study have given their written informed consent.

Study participants were asked to fast before the clinic visit, during which a blood sample was obtained and a physical examination performed. Race, education and smoking status were determined by participant self-report. Body mass index (BMI) was calculated as weight (in kilograms) divided by height (in meters) squared. Blood pressure was measured 3 times with the subject in the sitting position after 5 minutes of rest using a random-zero sphygmomanometer, and the last 2 measurements were averaged. Participants were asked to bring all medications with them to the clinic visits. A prescription bottle or self-report was used to determine cholesterol and blood pressure medication use. A 12-lead ECG at rest was used to define the presence of left ventricular hypertrophy (LVH). Diabetes was categorized as a fasting glucose of  $\geq 126$  mg/dl or non-fasting glucose level of  $\geq 200$  mg/dl, a reported a physician diagnosis of diabetes, or currently taking medication for diabetes. Prevalent coronary heart disease at baseline included a history of myocardial infarction, myocardial infarction adjudicated from the baseline ECG, or a history of coronary bypass or angioplasty. Prevalent heart failure at study enrollment was defined based on the Gothenburg criteria.<sup>2</sup>

#### FHS

The Original Cohort of the Framingham Heart Study (FHS) was initiated in 1948 with 5,209 participants from the town of Framingham. The 5,124 Offspring participants (children of the Original Cohort, and the children's spouses) were beginning in the early 1970s. The participants were largely of European ancestry and have been systematically examined every two to eight years since enrollment. The index examinations for the present analysis were completed between 1987-2007 with follow-up through 2011. The study protocol was approved by the Boston University Medical Center Institutional Review Board and all participants signed written informed consent.

In the FHS, for this study, baseline was defined as the date of DNA collection. Medication, alcohol use and smoking were ascertained by self-report. BMI was as weight (in kilograms) divided by height (in meters) squared and covariate values. Current smoking was defined as regular use of one or more cigarettes/day within the year prior to the Framingham clinic visit. Glucose was measured after an overnight fast in the Framingham Study laboratory. Diabetes was diagnosed as fasting glucose  $\geq 126$  mg/dL, or use of hypoglycemic medications. Blood pressure was determined in seated participants as the average of two Framingham Study physician systolic and diastolic blood

pressure measurements in mm Hg. Cardiovascular events were adjudicated by a panel of 3 physicians, examining participant hospitalization and outpatient records. Heart failure was diagnosed based on major and minor clinical criteria that have been used for all heart failure cases of FHS participants. Myocardial infarction was diagnosed based on the presence of clinical history, electrocardiographic signs, and biomarkers.

### **PREVEND**

The Prevention of Renal and Vascular End-Stage Disease (PREVEND) cohort study was founded in 1997 and is an ongoing community-based cohort study including 8,592 inhabitants of the city of Groningen, The Netherlands.<sup>3</sup> PREVEND is investigating the natural course of microalbuminuria and its relation to renal and cardiovascular disease. Details of the protocol and covariate definitions have been described elsewhere ([www.prevend.org](http://www.prevend.org)). Follow-up for this study was through 2008. The PREVEND study was approved by the institutional medical ethics committee and conducted in accordance with the Declaration of Helsinki. All participants provided written informed consent.

Covariates were assessed during study visits including 2 baseline visits to assess demographic, anthropometric, cardiovascular and metabolic risk factors. BMI was calculated as the ratio of weight to height squared. Systolic and diastolic blood pressure were calculated as the mean of two measurements. Anti-hypertensive medications were self-reported and included angiotensin converting enzyme inhibitors, angiotensin receptor blockers, diuretics, or calcium channel antagonists. Diabetes was defined as a fasting plasma glucose  $\geq 7.0$  mmol/L, or a non-fasting glucose  $\geq 11.1$  mmol/L, or use of anti-diabetic drugs. Smoking was defined as nicotine use in the 5 years prior to study entry. Previous myocardial infarction was defined using self-reported hospitalization of at least 3 days. Heart failure was assessed by an expert panel assessing hospitalization or outpatient records.

### **RS**

The Rotterdam Study (RS-I, RS-II) is a prospective, community-based cohort study of 7,983 subjects aged 55 years or older, designed to assess risk factors of morbidity (eg. coronary heart disease, heart failure, atrial fibrillation (AF), diabetes mellitus) in the elderly.<sup>4</sup> Study participants were recruited from the Ommoord district in the city of Rotterdam, Netherlands. Enrollment for RS-I accrued from 1990-1993. In 2000, participants who had become 55 years of age or moved into the study district since the start of the study were added to the cohort (RS-II). Follow-up for this analysis was through 2010. The Medical Ethics Committee of the Erasmus Medical Center approved the study, and written consent was obtained from all participants.

Information on current health status, medical history, and smoking was obtained using a computerized questionnaire. Participants were classified as current or non-smokers. BMI was calculated as weight in kilograms divided by the square of height in meters. Blood pressure was measured twice at the right upper arm with a random zero mercury sphygmomanometer in the sitting position. Systolic and diastolic blood pressures were calculated as the average of the two consecutive measurements. A history of myocardial infarction was defined as a self-reported myocardial infarction with hospital admission or the presence of a myocardial infarction on the ECG. Diabetes was defined as the use of anti-diabetic medication or a random or post-load serum glucose level of 200 mg/dL or more. Diagnosis of heart failure was based on a score of heart failure symptoms, on medication prescribed with the indication of heart failure, on hospital discharge diagnoses, and on the information available in general practitioner files.

### **WGHS**

The Women's Genome Health Study (WGHS) is a prospective cohort comprised of over 25,000 initially healthy female health professionals enrolled in the Women's Health Study (WHS). The WHS cohort, a completed randomized trial of vitamin E and low-dose aspirin for the primary prevention of cancer and cardiovascular disease, began in 1993 in women aged 45 years or older and free of cardiovascular disease (including prior myocardial infarction or heart failure) and cancer. After the end of randomized treatment on March 31, 2004, all participants were invited to participate in continued observational follow-up which extended until 2011 for this study. The study was approved by the institutional review board of the Brigham and Women's Hospital (Boston, Massachusetts), and written informed consent was obtained from all participants.

All participants in WGHS provided baseline blood samples and extensive survey data collated from questionnaires obtained every 6 months for the first year and every 12 months thereafter.<sup>5</sup> Covariates of interest assessed at study enrollment included age, height, weight, smoking status, hypertension (including anti-hypertensive medication use), and alcohol consumption.

## **1.2 Cohort-specific ascertainment of atrial fibrillation**

### **AGES**

AF or atrial flutter was diagnosed from Minnesota-coded ECG recorded at AGES study exams and from ICD-9 427.3 or ICD-10 I48 codes from hospital discharges in the National Hospital of Iceland database through April 2010.<sup>1</sup>

### **ARIC**

AF in ARIC was identified from 3 sources: ECG conducted at each study visit, hospital discharge codes (ICD-9CM 427.31, AF, or 427.32, atrial flutter), and death certificates (ICD-9 427.3 or ICD-10 I48). AF cases occurring during the same hospitalization as open cardiac surgery were not included as events.<sup>6,7</sup>

### **FHS**

Participants were classified as having AF if AF or atrial flutter was present on an ECG derived from a Framingham Study clinic tracing, on an ECG during an encounter with an external clinician, or by Holter monitoring, or if it was noted in hospital records. All incident AF cases were reviewed and adjudicated by one of two Framingham cardiologists.<sup>8,9</sup>

### **RS**

AF cases were ascertained at baseline and during follow-up as described previously.<sup>10</sup> Briefly, ECGs were recorded and stored digitally, and analyzed by the Modular ECG Analysis System. Two research physicians and a cardiologist verified AF diagnoses. Additional information was obtained from general practitioner records, from outpatient clinics, and from a national database of hospitalizations, which records all hospitalization discharge diagnoses occurring in the Netherlands. AF cases occurring during a serious disease resulting in death, or during myocardial infarction or cardiac operative procedures who recovered during the hospital admission were not included.

### **PREVEND**

Participants were classified as having AF if either atrial flutter or AF was present on a 12-lead ECG at (a) one of three follow-up visits, (b) an outpatient visit, or (c) hospital admission to one of two hospitals in the city of Groningen (University Medical Center Groningen and martini Hospital).<sup>11</sup>

### **WGHS**

Women were asked to report diagnoses of AF at baseline, 48 months, and then annually thereafter. Beginning on September 19, 2006, women enrolled in the continued observational follow-up who reported an incident AF event on at least one yearly questionnaire were sent an additional questionnaire to confirm the episode and to collect additional information. They were also asked for permission to review their medical records, particularly available ECGs, rhythm strips, 24-hour ECGs, and information on cardiac structure and function. For all deceased participants who reported AF during the trial and extended follow-up period, family members were contacted to obtain consent and additional relevant information. An end-point committee of physicians reviewed medical records for reported events according to predefined criteria. An AF event was confirmed if there was ECG evidence, or if a medical report clearly indicated a personal history of AF. The earliest date in the medical records when documentation was believed to have occurred was set as the date of onset of AF. Only confirmed events are included in this analysis.<sup>5</sup>

## Supplementary Tables and Figures

### 2.1. Supplemental Tables

**Supplemental Table 1. Characteristics of genotyping methodology, per cohort**

|                                           | <b>AGES</b>                                 | <b>ARIC</b>                                          | <b>FHS</b>                                                          | <b>PREVEND</b>                                     | <b>RS-I</b>                                            | <b>RS-II</b>                      | <b>WGHS</b>                 |
|-------------------------------------------|---------------------------------------------|------------------------------------------------------|---------------------------------------------------------------------|----------------------------------------------------|--------------------------------------------------------|-----------------------------------|-----------------------------|
| <b>Study</b>                              | Age, Gene/ Environment Susceptibility Study | Atherosclerosis Risk in Communities Study            | Framingham Heart Study                                              | Prevention of Renal and Vascular End-Stage Disease | Rotterdam Study                                        |                                   | Women's Genome Health Study |
| <b>Array</b>                              | Illumina HumanCNV370-Duo BeadChip           | Affymetrix 6.0                                       | Affymetrix Gene Chip® 500K Array Set & 50K Human Gene Focused Panel | Illumina Cyto SNP12 v2 array                       | Illumina Infinium HumanHap550-chip v3.0                |                                   | Illumina HumanHap300 Duo+   |
| <b>Calling Algorithm</b>                  | BeadStudio                                  | Birdseed                                             | BRLMM                                                               | Genomestudio                                       | BeadStudio                                             | BeadStudio                        |                             |
| <b>Per SNP Call rate</b>                  | <98%                                        | <95%                                                 | <97%                                                                | 95%                                                | <98%                                                   | <90%                              |                             |
| <b>HWE p-value</b>                        | <10 <sup>-5</sup>                           | <10 <sup>-5</sup>                                    | <10 <sup>-6</sup>                                                   | <10 <sup>-5</sup>                                  | <10 <sup>-6</sup>                                      | <10 <sup>-6</sup>                 |                             |
| <b>Excess heterozygosity</b>              | NA                                          | NA                                                   | subject heterozygosity >5 SD away from the mean                     | NA                                                 | >0.336; n=21                                           |                                   | NA                          |
| <b>MAF</b>                                | <1%                                         | <1%                                                  | <1%                                                                 | <1%                                                | <1%                                                    | <1%                               |                             |
| <b>Selection criteria for PCs</b>         | Association with AF (p<0.05)                | Eigenstrat: anyone >8 SD from top 10 PCs was removed | Association with AF (p<0.05)                                        | Top 10 PCs                                         | Outliers as identified by IBS clustering were excluded |                                   | Top 10 PCs                  |
| <b>Number of PCs in the model</b>         | 0                                           | 0                                                    | 0                                                                   | 10                                                 | 0                                                      | 10                                |                             |
| <b>Number of SNPs used for imputation</b> | 308,340                                     | 711,589                                              | 385,958                                                             | 232,571                                            | 530,683                                                | 331959                            |                             |
| <b>Imputation software</b>                | Mach1 v 1.0.16                              | Shapelt(v1.r532) + IMPUTE 2.1.0                      | Mach1 v 1.0.15                                                      | Shapeit v2.790 + Impute2                           | Mach1 v 1.0.15                                         | Mach1 v. 1.0.16 HapMap II CEU r22 |                             |

|                                                                 | <b>AGES</b>                         | <b>ARIC</b>                         | <b>FHS</b>                          | <b>PREVEND</b>                      | <b>RS-I</b>                         | <b>RS-II</b>                        |
|-----------------------------------------------------------------|-------------------------------------|-------------------------------------|-------------------------------------|-------------------------------------|-------------------------------------|-------------------------------------|
| <b>Imputation Reference Panel</b>                               | 1000 Genomes phase I v3, March 2012 |
| <b>SNP position from NCBI build</b>                             | Build 36                            | Build 37                            | Build 36                            | Build 37                            | Build 36                            | Build 36                            |
| <b>GWAS Statistical Analysis</b>                                | ProbABEL, R                         | FAST                                | R packages kinship, GEE, COXPH      | NA                                  | Mach2QTL GenABEL + PLINK, R, GRIMP  | ProbABEL, R                         |
| <b>Total number of SNPs used in the analysis (MAF&gt;0.005)</b> | 2,408,991                           | 2,512,759                           | 2501666                             | NA                                  | 2,502,002                           | 2,608,508                           |

AGES, indicates the Age, Gene/Environment Susceptibility—Reykjavik study; ARIC, Atherosclerosis Risk in Communities; FHS, Framingham Heart Study; PREVEND, Prevention of Renal and Vascular End-Stage Disease; RS, Rotterdam Study; WGHS, Women's Genome Health Study; SNP, single nucleotide polymorphism; HWE, Hardy Weinberg equilibrium; MAF, minor allele frequency; NCBI, National Center for Biotechnology Information; GWAS, genome wide association study; NA, not available; PCs, principal components; BRLMM, Bayesian Robust Linear Modeling.  
 PLINK, <http://pngu.mgh.harvard.edu/purcell/PLINK/>  
 Eigenstrat, <http://genepath.med.harvard.edu/~reich/Software.htm>  
 MACH, <http://www.sph.umich.edu/csg/abecasis/MaCH/index.html>  
 BIMBAM, <http://stephenslab.uchicago.edu/software.html>

**Supplemental Table 2. Characteristics of the 39 established SNPs for BMI**

| SNP        | Nearest gene    | Alleles |       | Frequency<br>Effect Allele | Per allele<br>change in<br>BMI | Explained<br>variance | P                      |
|------------|-----------------|---------|-------|----------------------------|--------------------------------|-----------------------|------------------------|
|            |                 | Effect  | Other |                            |                                |                       |                        |
| rs1558902  | <i>FTO</i>      | A       | T     | 0.42                       | 0.39 (0.02)                    | 0.34%                 | 4.8x10 <sup>-120</sup> |
| rs2867125  | <i>TMEM18</i>   | C       | T     | 0.83                       | 0.31 (0.03)                    | 0.15%                 | 2.77x10 <sup>-49</sup> |
| rs571312   | <i>MC4R</i>     | A       | C     | 0.24                       | 0.23 (0.03)                    | 0.10%                 | 6.43x10 <sup>-42</sup> |
| rs10938397 | <i>GNPDA2</i>   | G       | A     | 0.43                       | 0.18 (0.02)                    | 0.08%                 | 3.78x10 <sup>-31</sup> |
| rs10767664 | <i>BDNF</i>     | A       | T     | 0.78                       | 0.19 (0.03)                    | 0.07%                 | 4.69x10 <sup>-26</sup> |
| rs2815752  | <i>NEGR1</i>    | A       | G     | 0.61                       | 0.13 (0.02)                    | 0.04%                 | 1.16x10 <sup>-22</sup> |
| rs7359397  | <i>SH2B1</i>    | T       | C     | 0.4                        | 0.15 (0.02)                    | 0.05%                 | 1.88x10 <sup>-20</sup> |
| rs9816226  | <i>ETV5</i>     | T       | A     | 0.82                       | 0.14 (0.03)                    | 0.03%                 | 1.69x10 <sup>-18</sup> |
| rs3817334  | <i>MTCH2</i>    | T       | C     | 0.41                       | 0.06 (0.02)                    | 0.01%                 | 1.59x10 <sup>-12</sup> |
| rs29941    | <i>KCTD15</i>   | G       | A     | 0.67                       | 0.06 (0.02)                    | 0.00%                 | 3.01x10 <sup>-9</sup>  |
| rs543874   | <i>SEC16B</i>   | G       | A     | 0.19                       | 0.22 (0.03)                    | 0.07%                 | 3.56x10 <sup>-23</sup> |
| rs987237   | <i>TFAP2B</i>   | G       | A     | 0.18                       | 0.13 (0.03)                    | 0.03%                 | 2.90x10 <sup>-20</sup> |
| rs7138803  | <i>FAIM2</i>    | A       | G     | 0.38                       | 0.12 (0.02)                    | 0.04%                 | 1.82x10 <sup>-17</sup> |
| rs10150332 | <i>NRXN3</i>    | C       | T     | 0.21                       | 0.13 (0.03)                    | 0.02%                 | 2.75x10 <sup>-11</sup> |
| rs713586   | <i>RBJ</i>      | C       | T     | 0.47                       | 0.14 (0.02)                    | 0.06%                 | 6.17x10 <sup>-22</sup> |
| rs12444979 | <i>GPRC5B</i>   | C       | T     | 0.87                       | 0.17 (0.03)                    | 0.04%                 | 2.91x10 <sup>-21</sup> |
| rs2241423  | <i>MAP2K5</i>   | G       | A     | 0.78                       | 0.13 (0.02)                    | 0.03%                 | 1.19x10 <sup>-18</sup> |
| rs2287019  | <i>QPCTL</i>    | C       | T     | 0.8                        | 0.15 (0.03)                    | 0.04%                 | 1.88x10 <sup>-16</sup> |
| rs1514175  | <i>TNNI3K</i>   | A       | G     | 0.43                       | 0.07 (0.02)                    | 0.02%                 | 8.16x10 <sup>-14</sup> |
| rs13107325 | <i>SLC39A8</i>  | T       | C     | 0.07                       | 0.19 (0.04)                    | 0.03%                 | 1.50x10 <sup>-13</sup> |
| rs2112347  | <i>FLJ35779</i> | T       | G     | 0.63                       | 0.10 (0.02)                    | 0.02%                 | 2.17x10 <sup>-13</sup> |
| rs10968576 | <i>LRRN6C</i>   | G       | A     | 0.31                       | 0.11 (0.02)                    | 0.02%                 | 2.65x10 <sup>-13</sup> |
| rs3810291  | <i>TMEM160</i>  | A       | G     | 0.67                       | 0.09 (0.02)                    | 0.02%                 | 1.64x10 <sup>-12</sup> |
| rs887912   | <i>FANCL</i>    | T       | C     | 0.29                       | 0.10 (0.02)                    | 0.03%                 | 1.79x10 <sup>-12</sup> |
| rs13078807 | <i>CADM2</i>    | G       | A     | 0.2                        | 0.10 (0.02)                    | 0.02%                 | 3.94x10 <sup>-11</sup> |
| rs11847697 | <i>PRKD1</i>    | T       | C     | 0.04                       | 0.17 (0.05)                    | 0.01%                 | 5.76x10 <sup>-11</sup> |
| rs2890652  | <i>LRP1B</i>    | C       | T     | 0.18                       | 0.09 (0.03)                    | 0.02%                 | 1.35x10 <sup>-10</sup> |
| rs1555543  | <i>PTBP2</i>    | C       | A     | 0.59                       | 0.06 (0.02)                    | 0.01%                 | 3.68x10 <sup>-10</sup> |
| rs4771122  | <i>MTIF3</i>    | G       | A     | 0.24                       | 0.09 (0.03)                    | 0.02%                 | 9.48x10 <sup>-10</sup> |
| rs4836133  | <i>ZNF608</i>   | A       | C     | 0.48                       | 0.07 (0.02)                    | 0.01%                 | 1.97x10 <sup>-9</sup>  |
| rs4929949  | <i>RPL27A</i>   | C       | T     | 0.52                       | 0.06 (0.02)                    | 0.01%                 | 2.80x10 <sup>-9</sup>  |
| rs206936   | <i>NUDT3</i>    | G       | A     | 0.21                       | 0.06 (0.02)                    | 0.01%                 | 3.02x10 <sup>-8</sup>  |

| SNP        | Nearest gene    | Alleles |   | Frequency<br>Effect Allele | Per allele<br>change in<br>BMI | Explained<br>variance | P                      |
|------------|-----------------|---------|---|----------------------------|--------------------------------|-----------------------|------------------------|
| rs7989336  | <i>HS6ST3</i>   | A       | G | 0.47                       | 0.016                          | -                     | 8.80x10 <sup>-6</sup>  |
| rs17381664 | <i>ZZZ3</i>     | C       | T | 0.39                       | 0.022                          | -                     | 2.50x10 <sup>-11</sup> |
| rs17024258 | <i>GNAT2</i>    | T       | C | 0.04                       | 0.067                          | -                     | 4.34x10 <sup>-14</sup> |
| rs4735692  | <i>HNF4G</i>    | A       | G | 0.58                       | 0.019                          | -                     | 9.94x10 <sup>-10</sup> |
| rs13041126 | <i>MRPS33P4</i> | T       | C | 0.72                       | 0.017                          | -                     | 8.52x10 <sup>-7</sup>  |
| rs2531995  | <i>ADCY9</i>    | T       | C | 0.61                       | 0.021                          | -                     | 6.58x10 <sup>-8</sup>  |
| rs7503807  | <i>RPTOR</i>    | A       | C | 0.57                       | 0.02                           | -                     | 3.00x10 <sup>-10</sup> |

SNPs, single nucleotide polymorphisms; BMI, body mass index. Data are taken from Speliotes et al.<sup>12</sup> and Berndt et al.<sup>13</sup> Percent of BMI variance explained by given SNP is reported when available.



**Supplemental Table 3. Heterogeneity of meta-analyzed genetic instrument association with BMI and AF: meta-regression analysis**

| Association                | Primary Analysis   |       |                    |       | Meta-Regression<br>(Mean Age) |      |                    |      | Meta-Regression<br>(Mean Age, Mean Height, % Men) |      |                    |      |
|----------------------------|--------------------|-------|--------------------|-------|-------------------------------|------|--------------------|------|---------------------------------------------------|------|--------------------|------|
|                            | FTO                |       | Gene Score         |       | FTO                           |      | Gene Score         |      | FTO                                               |      | Gene Score         |      |
|                            | I <sup>2</sup> (%) | Qp    | I <sup>2</sup> (%) | Qp    | I <sup>2</sup> (%)            | Qp   | I <sup>2</sup> (%) | Qp   | I <sup>2</sup> (%)                                | Qp   | I <sup>2</sup> (%) | Qp   |
| <b>Instrument-BMI</b>      |                    |       |                    |       |                               |      |                    |      |                                                   |      |                    |      |
| <i>Model 1</i>             | 67.9               | <0.01 | 72.3               | <0.01 | 37.5                          | 0.17 | 37.5               | 0.16 | 31.3                                              | 0.25 | 9.5                | 0.37 |
| <i>Model 2</i>             | 59.8               | 0.02  | 76.2               | <0.01 | 29.5                          | 0.22 | 47.2               | 0.10 | 11.8                                              | 0.36 | 27.5               | 0.27 |
| <i>Model 3</i>             | 47.9               | 0.09  | 64.9               | 0.01  | 0                             | 0.57 | 0                  | 0.50 | 0                                                 | 0.46 | 0                  | 0.42 |
| <i>Model 4</i>             | 49.7               | 0.08  | 64.3               | 0.01  | 0                             | 0.58 | 0                  | 0.30 | 0                                                 | 0.49 | 26.6               | 0.24 |
| <b>Instrument-AF</b>       |                    |       |                    |       |                               |      |                    |      |                                                   |      |                    |      |
| <i>Model 1</i>             | 0                  | 0.83  | 0                  | 0.73  |                               |      |                    |      |                                                   |      |                    |      |
| <i>Model 2</i>             | 0                  | 0.84  | 0                  | 0.68  | -                             | -    | -                  | -    | -                                                 | -    | -                  | -    |
| <i>Model 3</i>             | 0                  | 0.80  | 0                  | 0.87  |                               |      |                    |      |                                                   |      |                    |      |
| <i>Model 4</i>             | 0                  | 0.82  | 0                  | 0.89  |                               |      |                    |      |                                                   |      |                    |      |
| <b>Instrument-AF + BMI</b> |                    |       |                    |       |                               |      |                    |      |                                                   |      |                    |      |
| <i>Model 1</i>             | 0                  | 0.83  | 0                  | 0.88  |                               |      |                    |      |                                                   |      |                    |      |
| <i>Model 2</i>             | 0                  | 0.83  | 0                  | 0.91  | -                             | -    | -                  | -    | -                                                 | -    | -                  | -    |
| <i>Model 3</i>             | 0                  | 0.82  | 0                  | 0.94  |                               |      |                    |      |                                                   |      |                    |      |
| <i>Model 4</i>             | 0                  | 0.81  | 0                  | 0.95  |                               |      |                    |      |                                                   |      |                    |      |

Shown are heterogeneity estimates for the meta-analyzed associations of each genetic instrument (FTO, gene score) with BMI and AF. Instrument-AF models were further adjusted for BMI in mediation analysis. I<sup>2</sup> reflects heterogeneity across studies with greater values reflecting greater heterogeneity. Qp reflects Cochran's Q statistic, a test for heterogeneity. Given evidence of moderate heterogeneity of the instrument-BMI associations, additional meta-regression was performed to assess for sources of heterogeneity. Shown are residual heterogeneity estimates of the meta-analyzed instrument-BMI associations after accounting for (a) mean age of each cohort as well as (b) proportion of men and mean height. Model 1: adjustment for age and sex. Model 2: Model 1 + smoking status and alcohol intake. Model 3: Model 2 + potential mediators of BMI-AF association (systolic blood pressure, diastolic blood pressure, use of antihypertensive medication, diabetes, previous coronary heart disease and previous heart failure). Model 4: Model 3 + height. BMI, body mass index. AF, atrial fibrillation.

**Supplemental Table 4: Meta-analyzed instrumental variable estimates of BMI-AF: sensitivity analysis**

| Methodology | IV Estimate Method 1 |         |                    |         | IV Estimate Method 2 |         |                    |         |
|-------------|----------------------|---------|--------------------|---------|----------------------|---------|--------------------|---------|
|             | <i>FTO</i>           |         | <i>Gene Score</i>  |         | <i>FTO</i>           |         | <i>Gene Score</i>  |         |
|             | HR [95% CI]          | P-value | HR [95% CI]        | P-value | HR [95% CI]          | P-value | HR [95% CI]        | P-value |
| Model 1     | 1.15 (1.05-1.27)     | 0.004   | 1.11 (1.05-1.17)   | <0.001  | 1.17 (1.05-1.31)     | 0.006   | 1.11 (1.05-1.17)   | < 0.001 |
| Model 2     | 1.15 (1.05-1.27)     | 0.03    | 1.10 (1.05-1.16)   | <0.001  | 1.16 (1.04-1.30)     | 0.006   | 1.11 (1.04-1.17)   | <       |
| Model 3     | 1.14 (1.02-1.28)     | 0.02    | 1.09 (1.03-1.15)   | 0.004   | 1.15 (1.02-1.30)     | 0.027   | 1.09 (1.02-1.16)   | 0.001   |
| Model 4     | 1.15 (1.03-1.29)     | 0.02    | 1.09 (1.03-1.15)   | 0.005   | 1.16 (1.02-1.32)     | 0.019   | 1.09 (1.02-1.16)   | 0.008   |
|             | <i>FTO</i>           |         | <i>Gene Score</i>  |         | <i>FTO</i>           |         | <i>Gene Score</i>  |         |
|             | I <sup>2</sup> (%)   | Qp      | I <sup>2</sup> (%) | Qp      | I <sup>2</sup> (%)   | Qp      | I <sup>2</sup> (%) | Qp      |
| Model 1     | 0                    | 0.91    | 0                  | 0.91    |                      |         |                    |         |
| Model 2     | 0                    | 0.95    | 0                  | 0.89    | -                    | -       | -                  | -       |
| Model 3     | 0                    | 0.87    | 0                  | 0.96    |                      |         |                    |         |
| Model 4     | 0                    | 0.88    | 0                  | 0.96    |                      |         |                    |         |

Shown are the meta-analyzed instrumental variable (IV) risk estimates of body mass index (BMI; per kg/m<sup>2</sup>) for incident AF in adjusted models (1-4). IV estimates were derived using two methods. Method 1 refers to estimation of cohort-specific IV estimates followed by meta-analysis (presented in manuscript Table 3). Method 2 utilized study-combined estimates of the genetic instrument (*FTO*, gene score) associations with BMI and AF. The inferred causal effect of BMI on AF was then derived as the ratio of these estimates (see Methods). I<sup>2</sup> reflects heterogeneity across studies with greater values reflecting greater heterogeneity. Qp reflects Cochran's Q statistic, a test for heterogeneity. As Method 2 employs study-combined estimates, the relevant heterogeneity statistics for instrument-BMI and instrument-AF associations are reported elsewhere (see Supplementary Table 3). Model 1: adjustment for age and sex. Model 2: Model 1 + smoking status and alcohol intake. Model 3: Model 2 + potential mediators of BMI-AF association (systolic blood pressure, diastolic blood pressure, use of antihypertensive medication, diabetes, previous coronary heart disease and previous heart failure). Model 4: Model 3 + height. BMI, body mass index. AF, atrial fibrillation. HR, hazard ratio; CI, confidence interval.

## 2.2. Supplementary Figures

### Supplementary Figure Legends

#### **Supplemental Figure 1:** Meta-regression plot of genetic instrument effect size and mean cohort age

Shown is a meta-regression plot of the instrument-BMI effect size (adjusted for age, age-squared, and sex) against mean age at time of cohort enrollment. The regression equation for each genetic instrument (*FTO*, BMI gene score) is shown inclusive of the slope (i.e.  $\Delta$  effect size per year of mean cohort age). Mean cohort age demonstrated significant inverse association with instrument-AF effect size (*FTO*, p-value = 0.01; BMI gene score, p=0.004). BMI, body mass index.

#### **Supplemental Figure 2:** Genetic instruments and body mass index

Study-specific and meta-analyzed pooled associations between each genetic instrument (*FTO*, BMI gene score) and BMI are shown with multivariable adjustment (Models 2-4; see Methods). (A) Model 1 is adjusted for age, age-squared, and sex. Multivariable adjustment include (B) Model 2: Model 1 + smoking status, alcohol intake, (C) Model 3: Model 2 + known mediators of the BMI-AF association (systolic and diastolic blood pressure, anti-hypertensive medication use, diabetes mellitus, previous heart failure or coronary heart disease), and (D) Model 4: Model 3 + height. There was moderate heterogeneity in the meta-analyzed instrument-BMI association across studies in each model which was substantially attenuated in meta-regression accounting for mean age in each cohort (Supplementary Table 3 for heterogeneity statistics for each model). Gene score estimate are shown per 1-unit change as well as per 1 standard deviation (SD) change. BMI; body mass index; AF, atrial fibrillation.

#### **Supplemental Figure 3:** Genetic instruments and atrial fibrillation: adjustment for BMI

To assess whether the observed association between genetic instruments (*FTO*, BMI gene score) and incident AF was mediated by BMI, instrument-AF models were adjusted for BMI measured at study enrollment. Shown are study-specific and meta-analyzed pooled estimates for the associations between each genetic instrument (*FTO*, gene score) and risk of incident AF. Models shown are (A) Model 1: age, sex + BMI, (B) Model 2: Model 1 + smoking status, alcohol intake, (C) Model 3: Model 2 + known mediators of the BMI-AF association (systolic and diastolic blood pressure, anti-hypertensive medication use, diabetes mellitus, previous heart failure or coronary heart disease) and (D) Model 4: Model 3 + height. BMI; body mass index. There was minimal heterogeneity of meta-analyzed estimates in all BMI-adjusted models ( $I^2 = 0\%$  for all models; see Supplementary Table 3 for heterogeneity statistics). Gene score estimate are shown per 1-unit change as well as per 1 standard deviation (SD) change. BMI; body mass index; AF, atrial fibrillation.

Supplemental Figure 1: Meta-regression plot of genetic instrument effect size and mean cohort age

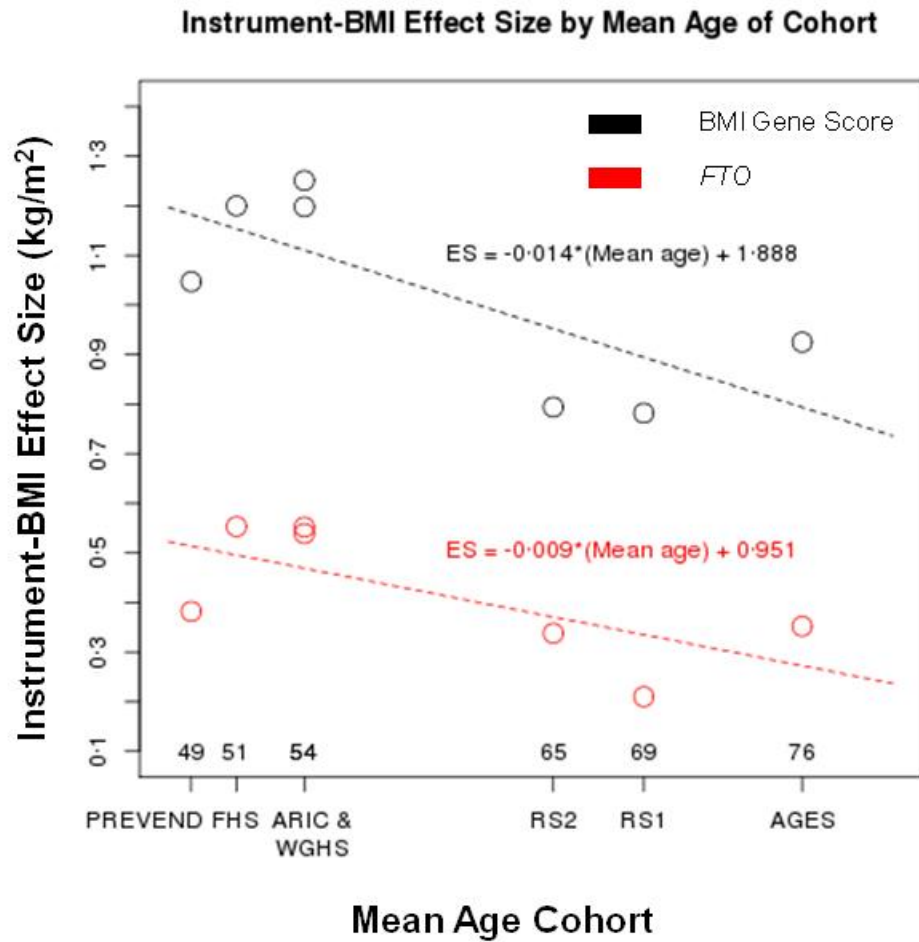

Supplemental Figure 2: Genetic instruments and body mass index

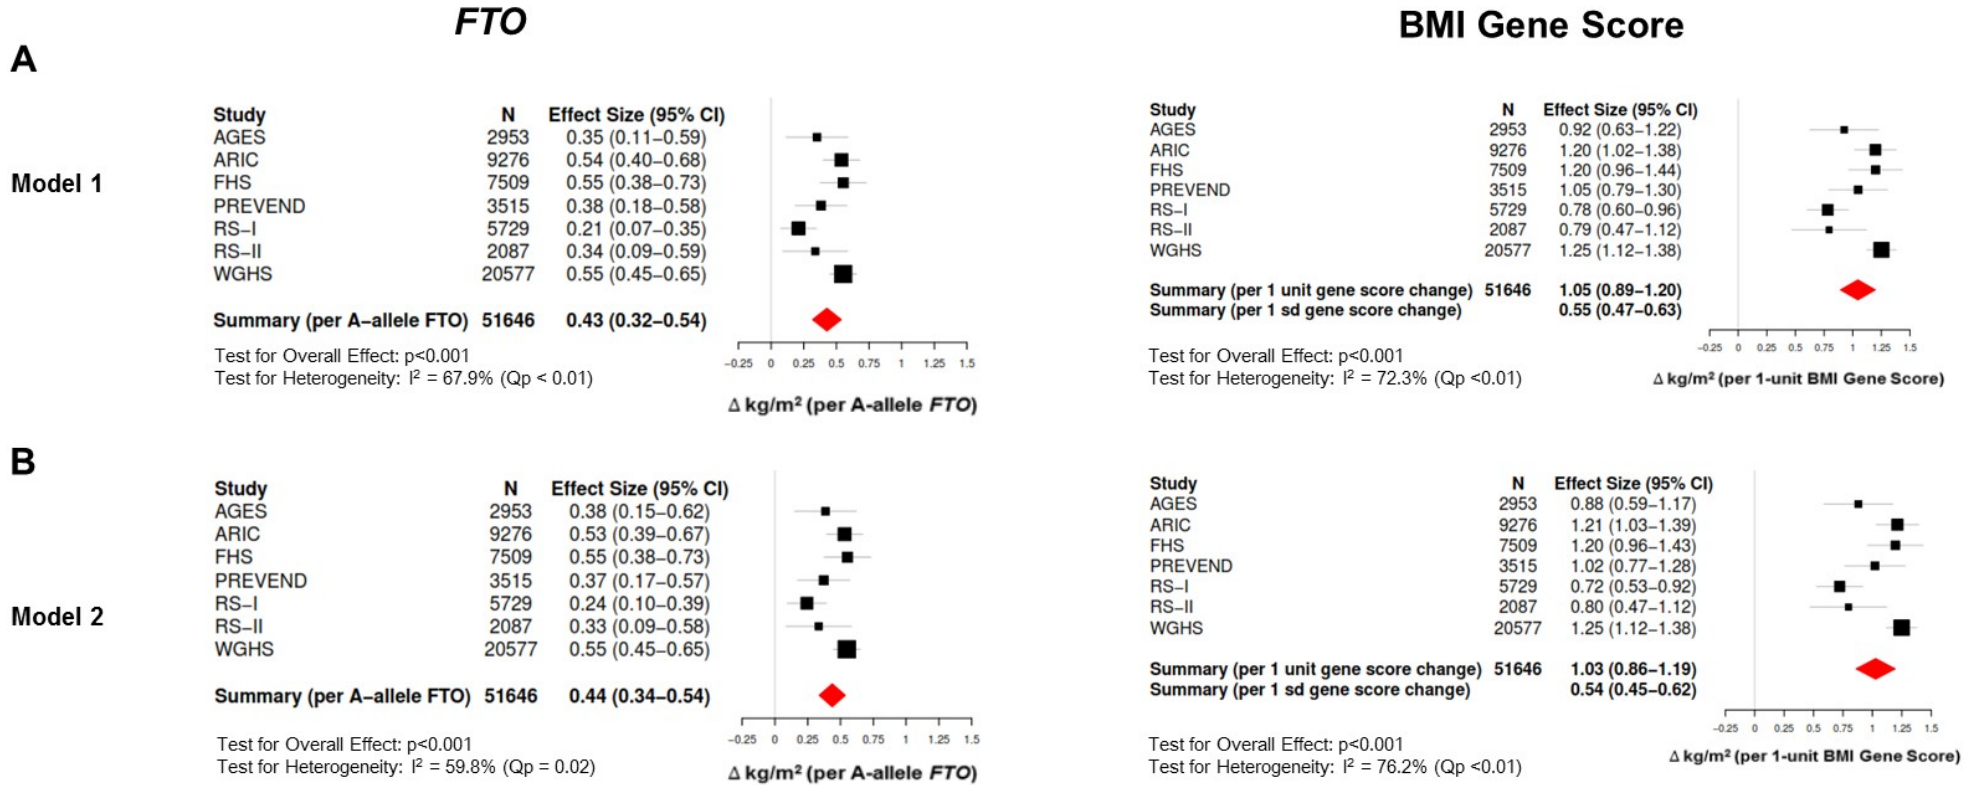

C

Model 3

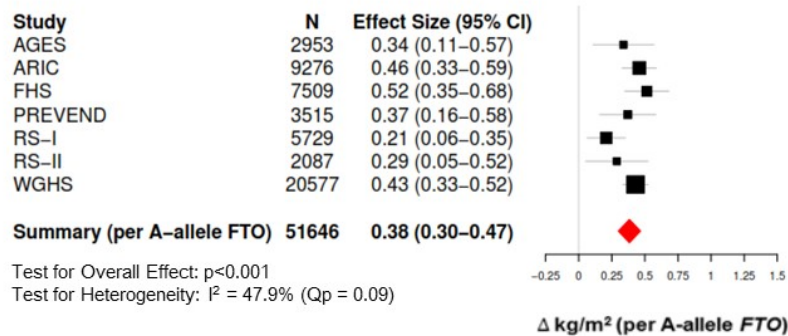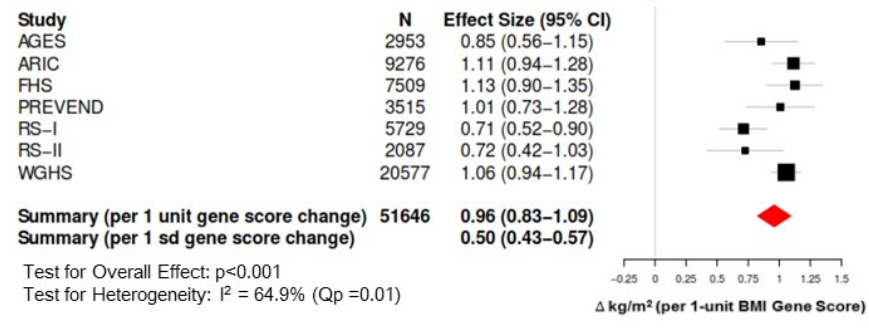

D

Model 4

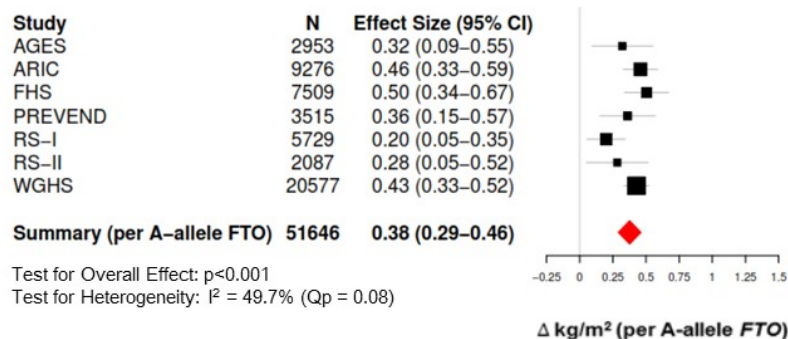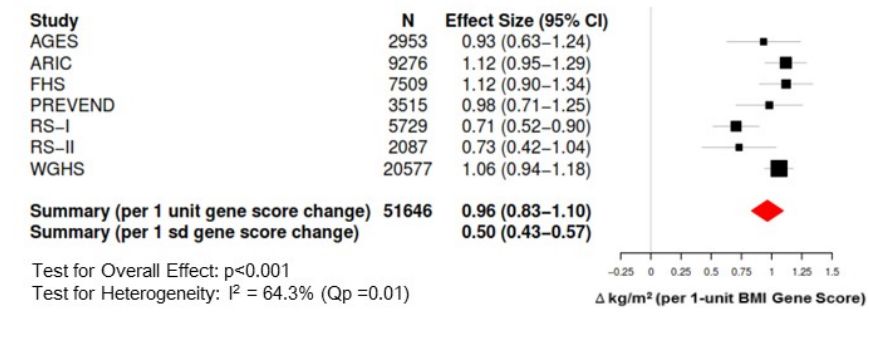

Supplemental Figure 3: Genetic instruments and atrial fibrillation: adjustment for BMI

**A**

**FTO**

**BMI Gene Score**

**Model 1 + BMI**

| Study   | Sample Size | Cases | HR (95% CI)      |
|---------|-------------|-------|------------------|
| AGES    | 2953        | 422   | 1.11 (0.96–1.28) |
| ARIC    | 9276        | 1373  | 1.01 (0.93–1.09) |
| FHS     | 7509        | 555   | 1.08 (0.96–1.22) |
| PREVEND | 3515        | 113   | 1.04 (0.80–1.36) |
| RS-I    | 5729        | 693   | 1.02 (0.92–1.14) |
| RS-II   | 2087        | 80    | 0.95 (0.70–1.30) |
| WGHS    | 20577       | 942   | 1.08 (0.98–1.19) |

Summary (per A-allele *FTO*) 51646 4178 1.04 (1.00–1.09)

Test for Overall Effect:  $p=0.057$   
 Test for Heterogeneity:  $I^2 = 0\%$  ( $Q_p = 0.83$ )

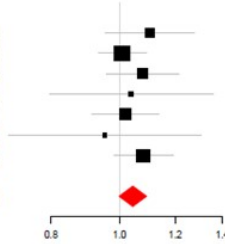

| Study   | Sample Size | Cases | HR (95% CI)      |
|---------|-------------|-------|------------------|
| AGES    | 2953        | 422   | 1.02 (0.85–1.23) |
| ARIC    | 9276        | 1373  | 1.08 (0.98–1.19) |
| FHS     | 7509        | 555   | 1.11 (0.95–1.31) |
| PREVEND | 3515        | 113   | 1.04 (0.72–1.48) |
| RS-I    | 5729        | 693   | 1.01 (0.87–1.16) |
| RS-II   | 2087        | 80    | 0.84 (0.55–1.28) |
| WGHS    | 20577       | 942   | 1.05 (0.93–1.19) |

Summary (per 1 unit gene score change) 51646 4178 1.06 (1.00–1.12)  
 Summary (per 1 sd gene score change) 1.03 (1.00–1.06)

Test for Overall Effect:  $p=0.063$   
 Test for Heterogeneity:  $I^2 = 0\%$  ( $Q_p = 0.88$ )

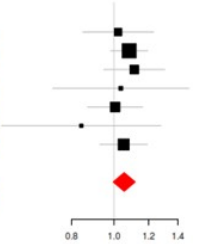

**B**

**Model 2 + BMI**

| Study   | Sample Size | Cases | HR (95% CI)      |
|---------|-------------|-------|------------------|
| AGES    | 2953        | 422   | 1.09 (0.94–1.26) |
| ARIC    | 9276        | 1373  | 1.01 (0.93–1.09) |
| FHS     | 7509        | 555   | 1.07 (0.95–1.21) |
| PREVEND | 3515        | 113   | 1.05 (0.80–1.37) |
| RS-I    | 5729        | 693   | 1.00 (0.89–1.12) |
| RS-II   | 2087        | 80    | 0.96 (0.70–1.32) |
| WGHS    | 20577       | 942   | 1.08 (0.98–1.19) |

Summary (per A-allele *FTO*) 51646 4178 1.04 (0.99–1.09)

Test for Overall Effect:  $p=0.174$   
 Test for Heterogeneity:  $I^2 = 0\%$  ( $Q_p = 0.83$ )

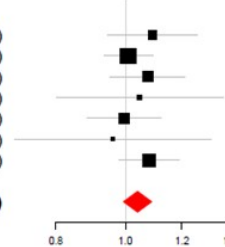

| Study   | Sample Size | Cases | HR (95% CI)      |
|---------|-------------|-------|------------------|
| AGES    | 2953        | 422   | 1.01 (0.84–1.22) |
| ARIC    | 9276        | 1373  | 1.06 (0.96–1.17) |
| FHS     | 7509        | 555   | 1.11 (0.94–1.31) |
| PREVEND | 3515        | 113   | 1.01 (0.70–1.44) |
| RS-I    | 5729        | 693   | 1.00 (0.85–1.17) |
| RS-II   | 2087        | 80    | 0.84 (0.55–1.27) |
| WGHS    | 20577       | 942   | 1.05 (0.93–1.19) |

Summary (per 1 unit gene score change) 51646 4178 1.05 (0.99–1.11)  
 Summary (per 1 sd gene score change) 1.02 (0.99–1.06)

Test for Overall Effect:  $p=0.247$   
 Test for Heterogeneity:  $I^2 = 0\%$  ( $Q_p = 0.91$ )

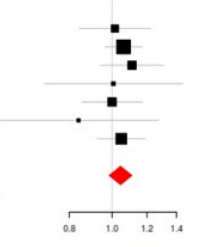

**C**

**Model 3 + BMI**

| Study                                    | Sample Size  | Cases       | HR (95% CI)             |
|------------------------------------------|--------------|-------------|-------------------------|
| AGES                                     | 2953         | 422         | 1.09 (0.94–1.26)        |
| ARIC                                     | 9276         | 1373        | 1.01 (0.93–1.09)        |
| FHS                                      | 7509         | 555         | 1.08 (0.96–1.22)        |
| PREVEND                                  | 3515         | 113         | 0.93 (0.69–1.25)        |
| RS-I                                     | 5729         | 693         | 1.00 (0.89–1.13)        |
| RS-II                                    | 2087         | 80          | 1.01 (0.73–1.38)        |
| WGHS                                     | 20577        | 942         | 1.07 (0.97–1.18)        |
| <b>Summary (per A-allele <i>FTO</i>)</b> | <b>51646</b> | <b>4178</b> | <b>1.04 (0.99–1.09)</b> |

Test for Overall Effect:  $p=0.107$   
 Test for Heterogeneity:  $I^2 = 0\%$  ( $Q_p = 0.82$ )

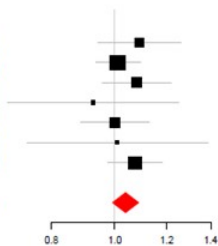

| Study                                         | Sample Size  | Cases       | HR (95% CI)             |
|-----------------------------------------------|--------------|-------------|-------------------------|
| AGES                                          | 2953         | 422         | 1.03 (0.86–1.25)        |
| ARIC                                          | 9276         | 1373        | 1.06 (0.96–1.17)        |
| FHS                                           | 7509         | 555         | 1.11 (0.94–1.30)        |
| PREVEND                                       | 3515         | 113         | 1.03 (0.69–1.53)        |
| RS-I                                          | 5729         | 693         | 1.00 (0.85–1.17)        |
| RS-II                                         | 2087         | 80          | 0.86 (0.56–1.31)        |
| WGHS                                          | 20577        | 942         | 1.04 (0.92–1.18)        |
| <b>Summary (per 1 unit gene score change)</b> | <b>51646</b> | <b>4178</b> | <b>1.05 (0.99–1.11)</b> |
| <b>Summary (per 1 sd gene score change)</b>   |              |             | <b>1.02 (0.99–1.06)</b> |

Test for Overall Effect:  $p=0.118$   
 Test for Heterogeneity:  $I^2 = 0\%$  ( $Q_p = 0.94$ )

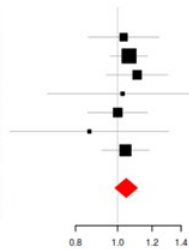

**D**

**Model 4 + BMI**

| Study                                    | Sample Size  | Cases       | HR (95% CI)             |
|------------------------------------------|--------------|-------------|-------------------------|
| AGES                                     | 2953         | 422         | 1.09 (0.94–1.26)        |
| ARIC                                     | 9276         | 1373        | 1.01 (0.93–1.09)        |
| FHS                                      | 7509         | 555         | 1.09 (0.96–1.22)        |
| PREVEND                                  | 3515         | 113         | 0.93 (0.69–1.26)        |
| RS-I                                     | 5729         | 693         | 1.01 (0.89–1.13)        |
| RS-II                                    | 2087         | 80          | 1.00 (0.73–1.38)        |
| WGHS                                     | 20577        | 942         | 1.08 (0.98–1.19)        |
| <b>Summary (per A-allele <i>FTO</i>)</b> | <b>51646</b> | <b>4178</b> | <b>1.04 (0.99–1.09)</b> |

Test for Overall Effect:  $p=0.088$   
 Test for Heterogeneity:  $I^2 = 0\%$  ( $Q_p = 0.81$ )

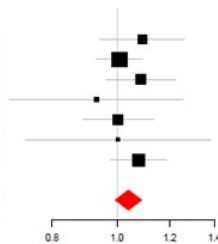

| Study                                         | Sample Size  | Cases       | HR (95% CI)             |
|-----------------------------------------------|--------------|-------------|-------------------------|
| AGES                                          | 2953         | 422         | 1.04 (0.86–1.25)        |
| ARIC                                          | 9276         | 1373        | 1.05 (0.95–1.16)        |
| FHS                                           | 7509         | 555         | 1.10 (0.93–1.29)        |
| PREVEND                                       | 3515         | 113         | 1.04 (0.69–1.55)        |
| RS-I                                          | 5729         | 693         | 1.00 (0.85–1.17)        |
| RS-II                                         | 2087         | 80          | 0.84 (0.55–1.28)        |
| WGHS                                          | 20577        | 942         | 1.03 (0.91–1.17)        |
| <b>Summary (per 1 unit gene score change)</b> | <b>51646</b> | <b>4178</b> | <b>1.04 (0.98–1.10)</b> |
| <b>Summary (per 1 sd gene score change)</b>   |              |             | <b>1.02 (0.99–1.05)</b> |

Test for Overall Effect:  $p=0.199$   
 Test for Heterogeneity:  $I^2 = 0\%$  ( $Q_p = 0.95$ )

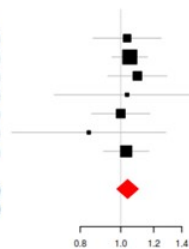



## Supplemental References

1. Harris TB, Launer LJ, Eiriksdottir G, Kjartansson O, Jonsson PV, Sigurdsson G, Thorgeirsson G, Aspelund T, Garcia ME, Cotch MF, Hoffman HJ and Gudnason V. Age, Gene/Environment Susceptibility-Reykjavik Study: multidisciplinary applied phenomics. *Am J Epidemiol.* 2007;165:1076-1087.
2. The Atherosclerosis Risk in Communities (ARIC) Study: design and objectives. The ARIC investigators. *Am J Epidemiol.* 1989;129:687-702.
3. Vermond RA, Geelhoed B, Verweij N, Tieleman RG, Van der Harst P, Hillege HL, Van Gilst WH, Van Gelder IC and Rienstra M. Incidence of Atrial Fibrillation and Relationship With Cardiovascular Events, Heart Failure, and Mortality: A Community-Based Study From the Netherlands. *J Am Coll Cardiol.* 2015;66:1000-1007.
4. Hofman A, Darwish Murad S, van Duijn CM, Franco OH, Goedegebure A, Ikram MA, Klaver CC, Nijsten TE, Peeters RP, Stricker BH, Tiemeier HW, Uitterlinden AG and Vernooij MW. The Rotterdam Study: 2014 objectives and design update. *Eur J Epidemiol.* 2013;28:889-926.
5. Ridker PM, Chasman DI, Zee RY, Parker A, Rose L, Cook NR and Buring JE. Rationale, design, and methodology of the Women's Genome Health Study: a genome-wide association study of more than 25,000 initially healthy american women. *Clin Chem.* 2008;54:249-255.
6. Alonso A, Agarwal SK, Soliman EZ, Ambrose M, Chamberlain AM, Prineas RJ and Folsom AR. Incidence of atrial fibrillation in whites and African-Americans: the Atherosclerosis Risk in Communities (ARIC) study. *Am Heart J.* 2009;158:111-1117.
7. Soliman EZ, Prineas RJ, Case LD, Zhang ZM and Goff DC, Jr. Ethnic distribution of ECG predictors of atrial fibrillation and its impact on understanding the ethnic distribution of ischemic stroke in the Atherosclerosis Risk in Communities (ARIC) study. *Stroke.* 2009;40:1204-1211.
8. Benjamin EJ, Levy D, Vaziri SM, D'Agostino RB, Belanger AJ and Wolf PA. Independent risk factors for atrial fibrillation in a population-based cohort. The Framingham Heart Study. *JAMA.* 1994;271:840-844.
9. Kannel WB, Feinleib M, McNamara PM, Garrison RJ and Castelli WP. An investigation of coronary heart disease in families. The Framingham offspring study. *Am J Epidemiol.* 1979;110:281-290.
10. Heeringa J, van der Kuip DA, Hofman A, Kors JA, van Herpen G, Stricker BH, Stijnen T, Lip GY and Witteman JC. Prevalence, incidence and lifetime risk of atrial fibrillation: the Rotterdam study. *Eur Heart J.* 2006;27:949-953.
11. Hobbelt AH, Siland JE, Geelhoed B, Van Der Harst P, Hillege HL, Van Gelder IC and Rienstra M. Clinical, biomarker, and genetic predictors of specific types of atrial fibrillation in a community-based cohort: data of the PREVEND study. *Europace.* 2016. doi:10.1093/europace/euw016.
12. Speliotes EK, Willer CJ, Berndt SI, Monda KL, Thorleifsson G, Jackson AU, Lango Allen H, Lindgren CM, Luan J, Magi R, Randall JC, Vedantam S, Winkler TW, Qi L, Workalemahu T, Heid IM, Steinthorsdottir V, Stringham HM, Weedon MN, Wheeler E, Wood AR, Ferreira T, Weyant RJ, Segre AV, Estrada K, Liang L, Nemesh J, Park JH, Gustafsson S, Kilpelainen TO, Yang J, Bouatia-Naji N, Esko T, Feitosa MF, Kutalik Z, Mangino M, Raychaudhuri S, Scherag A, Smith AV, Welch R, Zhao JH, Aben KK, Absher DM, Amin N, Dixon AL, Fisher E, Glazer NL, Goddard ME, Heard-Costa NL, Hoesel V, Hottenga JJ, Johansson A, Johnson T, Ketkar S, Lamina C, Li S, Moffatt MF, Myers RH, Narisu N, Perry JR, Peters MJ, Preuss M, Ripatti S, Rivadeneira F, Sandholt C, Scott LJ, Timpson NJ, Tyrer JP, van Wingerden S, Watanabe RM, White CC, Wiklund F, Barlassina C, Chasman DI, Cooper MN, Jansson JO, Lawrence RW, Pellikka N, Prokopenko I, Shi J, Thiering E, Alavere H, Alibrandi MT, Almgren P, Arnold AM, Aspelund T, Atwood LD, Balkau B, Balmforth AJ, Bennett AJ, Ben-Shlomo Y, Bergman RN, Bergmann S, Biebermann H, Blakemore AI, Boes T, Bonnycastle LL, Bornstein SR, Brown MJ, Buchanan TA, Busonero F, Campbell H, Cappuccio FP, Cavalcanti-Proenca C, Chen YD, Chen CM, Chines PS, Clarke R, Coin L, Connell J, Day IN, den Heijer M, Duan J, Ebrahim S, Elliott P, Elosua R, Eiriksdottir G, Erdos MR, Eriksson JG, Facheris MF, Felix SB, Fischer-Posovszky P, Folsom AR, Friedrich N, Freimer NB, Fu M, Gaget S, Gejman PV, Geus EJ, Gieger C, Gjesing AP, Goel A, Goyette

P, Grallert H, Grassler J, Greenawalt DM, Groves CJ, Gudnason V, Guiducci C, Hartikainen AL, Hassanali N, Hall AS, Havulinna AS, Hayward C, Heath AC, Hengstenberg C, Hicks AA, Hinney A, Hofman A, Homuth G, Hui J, Igl W, Iribarren C, Isomaa B, Jacobs KB, Jarick I, Jewell E, John U, Jorgensen T, Jousilahti P, Jula A, Kaakinen M, Kajantie E, Kaplan LM, Kathiresan S, Kettunen J, Kinnunen L, Knowles JW, Kolcic I, Konig IR, Koskinen S, Kovacs P, Kuusisto J, Kraft P, Kvaloy K, Laitinen J, Lantieri O, Lanzani C, Launer LJ, Lecoeur C, Lehtimaki T, Lettre G, Liu J, Lokki ML, Lorentzon M, Luben RN, Ludwig B, Manunta P, Marek D, Marre M, Martin NG, McArdle WL, McCarthy A, McKnight B, Meitinger T, Melander O, Meyre D, Midthjell K, Montgomery GW, Morcken MA, Morris AP, Mulic R, Ngwa JS, Nelis M, Neville MJ, Nyholt DR, O'Donnell CJ, O'Rahilly S, Ong KK, Oostra B, Pare G, Parker AN, Perola M, Pichler I, Pietilainen KH, Platou CG, Polasek O, Pouta A, Rafelt S, Raitakari O, Rayner NW, Ridderstrale M, Rief W, Ruokonen A, Robertson NR, Rzehak P, Salomaa V, Sanders AR, Sandhu MS, Sanna S, Saramies J, Savolainen MJ, Scherag S, Schipf S, Schreiber S, Schunkert H, Silander K, Sinisalo J, Siscovick DS, Smit JH, Soranzo N, Sovio U, Stephens J, Surakka I, Swift AJ, Tammesoo ML, Tardif JC, Teder-Laving M, Teslovich TM, Thompson JR, Thomson B, Tonjes A, Tuomi T, van Meurs JB, van Ommen GJ, Vatin V, Viikari J, Visvikis-Siest S, Vitart V, Vogel CI, Voight BF, Waite LL, Wallaschofski H, Walters GB, Widen E, Wiegand S, Wild SH, Willemsen G, Witte DR, Wittman JC, Xu J, Zhang Q, Zgaga L, Ziegler A, Zitting P, Beilby JP, Farooqi IS, Hebebrand J, Huikuri HV, James AL, Kahonen M, Levinson DF, Macciardi F, Nieminen MS, Ohlsson C, Palmer LJ, Ridker PM, Stumvoll M, Beckmann JS, Boeing H, Boerwinkle E, Boomsma DI, Caulfield MJ, Chanock SJ, Collins FS, Cupples LA, Smith GD, Erdmann J, Froguel P, Gronberg H, Gyllenstein U, Hall P, Hansen T, Harris TB, Hattersley AT, Hayes RB, Heinrich J, Hu FB, Hveem K, Illig T, Jarvelin MR, Kaprio J, Karpe F, Khaw KT, Kiemeny LA, Krude H, Laakso M, Lawlor DA, Metspalu A, Munroe PB, Ouwehand WH, Pedersen O, Penninx BW, Peters A, Pramstaller PP, Quertermous T, Reinehr T, Rissanen A, Rudan I, Samani NJ, Schwarz PE, Shuldiner AR, Spector TD, Tuomilehto J, Uda M, Uitterlinden A, Valle TT, Wabitsch M, Waeber G, Wareham NJ, Watkins H, Wilson JF, Wright AF, Zillikens MC, Chatterjee N, McCarroll SA, Purcell S, Schadt EE, Visscher PM, Assimes TL, Borecki IB, Deloukas P, Fox CS, Groop LC, Haritunians T, Hunter DJ, Kaplan RC, Mohlke KL, O'Connell JR, Peltonen L, Schlessinger D, Strachan DP, van Duijn CM, Wichmann HE, Frayling TM, Thorsteinsdottir U, Abecasis GR, Barroso I, Boehnke M, Stefansson K, North KE, McCarthy MI, Hirschhorn JN, Ingelsson E and Loos RJ. Association analyses of 249,796 individuals reveal 18 new loci associated with body mass index. *Nat Genet.* 2010;42:937-948.

13. Berndt SI, Gustafsson S, Magi R, Ganna A, Wheeler E, Feitosa MF, Justice AE, Monda KL, Croteau-Chonka DC, Day FR, Esko T, Fall T, Ferreira T, Gentilini D, Jackson AU, Luan J, Randall JC, Vedantam S, Willer CJ, Winkler TW, Wood AR, Workalemahu T, Hu YJ, Lee SH, Liang L, Lin DY, Min JL, Neale BM, Thorleifsson G, Yang J, Albrecht E, Amin N, Bragg-Gresham JL, Cadby G, den Heijer M, Eklund N, Fischer K, Goel A, Hottenga JJ, Huffman JE, Jarick I, Johansson A, Johnson T, Kanoni S, Kleber ME, Konig IR, Kristiansson K, Kutalik Z, Lamina C, Lecoeur C, Li G, Mangino M, McArdle WL, Medina-Gomez C, Muller-Nurasyid M, Ngwa JS, Nolte IM, Paternoster L, Pechlivanis S, Perola M, Peters MJ, Preuss M, Rose LM, Shi J, Shungin D, Smith AV, Strawbridge RJ, Surakka I, Teumer A, Trip MD, Tyrer J, Van Vliet-Ostaptchouk JV, Vandenput L, Waite LL, Zhao JH, Absher D, Asselbergs FW, Atalay M, Attwood AP, Balmforth AJ, Basart H, Beilby J, Bonnycastle LL, Brambilla P, Bruinenberg M, Campbell H, Chasman DI, Chines PS, Collins FS, Connell JM, Cookson WO, de Faire U, de Vegt F, Dei M, Dimitriou M, Edkins S, Estrada K, Evans DM, Farrall M, Ferrario MM, Ferrieres J, Franke L, Frau F, Gejman PV, Grallert H, Gronberg H, Gudnason V, Hall AS, Hall P, Hartikainen AL, Hayward C, Heard-Costa NL, Heath AC, Hebebrand J, Homuth G, Hu FB, Hunt SE, Hypponen E, Iribarren C, Jacobs KB, Jansson JO, Jula A, Kahonen M, Kathiresan S, Kee F, Khaw KT, Kivimaki M, Koenig W, Kraja AT, Kumari M, Kuulasmaa K, Kuusisto J, Laitinen JH, Lakka TA, Langenberg C, Launer LJ, Lind L, Lindstrom J, Liu J, Liuzzi A, Lokki ML, Lorentzon M, Madden PA, Magnusson PK, Manunta P, Marek D, Marz W, Mateo Leach I, McKnight B, Medland SE, Mihailov E, Milani L, Montgomery GW, Mooser V, Muhleisen TW, Munroe PB, Musk AW, Narisu N, Navis G, Nicholson G, Nohr EA, Ong KK, Oostra BA, Palmer CN, Palotie A, Peden JF, Pedersen N, Peters A, Polasek O, Pouta A, Pramstaller PP,

Prokopenko I, Putter C, Radhakrishnan A, Raitakari O, Rendon A, Rivadeneira F, Rudan I, Saaristo TE, Sambrook JG, Sanders AR, Sanna S, Saramies J, Schipf S, Schreiber S, Schunkert H, Shin SY, Signorini S, Sinisalo J, Skrobek B, Soranzo N, Stancakova A, Stark K, Stephens JC, Stirrups K, Stolk RP, Stumvoll M, Swift AJ, Theodoraki EV, Thorand B, Tregouet DA, Tremoli E, Van der Klauw MM, van Meurs JB, Vermeulen SH, Viikari J, Virtamo J, Vitart V, Waeber G, Wang Z, Widen E, Wild SH, Willemsen G, Winkelmann BR, Witteman JC, Wolffenbuttel BH, Wong A, Wright AF, Zillikens MC, Amouyel P, Boehm BO, Boerwinkle E, Boomsma DI, Caulfield MJ, Chanock SJ, Cupples LA, Cusi D, Dedoussis GV, Erdmann J, Eriksson JG, Franks PW, Froguel P, Gieger C, Gyllensten U, Hamsten A, Harris TB, Hengstenberg C, Hicks AA, Hingorani A, Hinney A, Hofman A, Hovingh KG, Hveem K, Illig T, Jarvelin MR, Jockel KH, Keinanen-Kiukaanniemi SM, Kiemeny LA, Kuh D, Laakso M, Lehtimaki T, Levinson DF, Martin NG, Metspalu A, Morris AD, Nieminen MS, Njolstad I, Ohlsson C, Oldehinkel AJ, Ouwehand WH, Palmer LJ, Penninx B, Power C, Province MA, Psaty BM, Qi L, Rauramaa R, Ridker PM, Ripatti S, Salomaa V, Samani NJ, Snieder H, Sorensen TI, Spector TD, Stefansson K, Tonjes A, Tuomilehto J, Uitterlinden AG, Uusitupa M, van der Harst P, Vollenweider P, Wallaschofski H, Wareham NJ, Watkins H, Wichmann HE, Wilson JF, Abecasis GR, Assimes TL, Barroso I, Boehnke M, Borecki IB, Deloukas P, Fox CS, Frayling T, Groop LC, Haritunian T, Heid IM, Hunter D, Kaplan RC, Karpe F, Moffatt MF, Mohlke KL, O'Connell JR, Pawitan Y, Schadt EE, Schlessinger D, Steinthorsdottir V, Strachan DP, Thorsteinsdottir U, van Duijn CM, Visscher PM, Di Blasio AM, Hirschhorn JN, Lindgren CM, Morris AP, Meyre D, Scherag A, McCarthy MI, Speliotes EK, North KE, Loos RJ and Ingelsson E. Genome-wide meta-analysis identifies 11 new loci for anthropometric traits and provides insights into genetic architecture. *Nat Genet.* 2013;45:501-512.
